1 **Microinjection to deliver protein, mRNA, and DNA into zygotes of the cnidarian**  
2 **endosymbiosis model *Aiptasia* sp.**

3

4

5

6 **Running Title:** Microinjection of *Aiptasia*

7

8

9 Victor A. S. Jones<sup>#,1</sup>, Madeline Bucher<sup>#,1</sup>, Elizabeth A. Hambleton<sup>1</sup>, Annika Guse<sup>\*,1</sup>

10

11 <sup>1</sup>Centre for Organismal Studies (COS), Heidelberg University, Im Neuenheimer Feld

12 230, 69120 Heidelberg, Germany

13 <sup>#</sup>contributed equally

14 <sup>\*</sup>corresponding author A.G.: [annika.guse@cos.uni-heidelberg.de](mailto:annika.guse@cos.uni-heidelberg.de); tel +49 6221

15 546264

16

17

18

19

20

21

22

23

24

25

26

27

28

29

30

31

32

33

34 **Key words**

35 Symbiosis, Emerging Model, *In Vitro* Fertilization, Microinjection, Functional Tools,

36 Transgenesis

37

38 **Summary Statement**

39

40 Toolkit extension: development of microinjection for cellular labelling, expression of  
41 exogenous genes and live imaging in *Aiptasia*, an emerging model for intracellular  
42 coral-algal symbiosis.

43

44

45 **Abstract**

46

47 Reef-building corals depend on an intracellular symbiosis with photosynthetic  
48 dinoflagellates for their survival in nutrient-poor oceans. Symbionts are phagocytosed  
49 by coral larvae from the environment and transfer essential nutrients to their hosts.  
50 *Aiptasia*, a small tropical marine sea anemone, is emerging as a tractable model  
51 system for coral symbiosis; however, to date functional tools and genetic  
52 transformation are lacking. Here we have established an efficient workflow to collect  
53 *Aiptasia* eggs for *in vitro* fertilization and microinjection as the basis for experimental  
54 manipulations in the developing embryo and larvae. We demonstrate that protein,  
55 mRNA, and DNA can successfully be injected into live *Aiptasia* zygotes to label actin  
56 with recombinant Lifeact-eGFP protein; to label nuclei and cell membranes with NLS-  
57 eGFP and farnesylated mCherry translated from injected mRNA; and to transiently  
58 drive transgene expression from an *Aiptasia*-specific promoter, respectively, in  
59 embryos and larvae. These proof-of-concept approaches pave the way for future  
60 functional studies of development and symbiosis establishment in *Aiptasia*, a  
61 powerful model to unravel the molecular mechanisms underlying intracellular coral-  
62 algal symbiosis.

63

64

65

66 **Introduction**

67

68 A complex yet fundamental puzzle in cell and developmental biology is how cells  
69 from different phyla coexist and co-function in symbiosis – how do very different cells  
70 encounter each other, what molecular conversations occur to promote symbiosis  
71 establishment, and how is such a complex partnership maintained in the steady  
72 state? An ecologically crucial symbiosis is that between reef-building corals and their  
73 single-celled dinoflagellate algae symbionts, which provide photosynthetically derived  
74 nutrients underlying the productivity and health of coral reef ecosystems (Muscatine,  
75 1990; Yellowlees, 2011). Strikingly, most corals must re-establish this vital symbiosis  
76 anew every generation in the larval or juvenile stage by taking up algal cells from the  
77 environment into the gastric cavity, after which they are phagocytosed into  
78 endodermal cells and reside as endosymbionts inside a specialized organelle, the  
79 symbiosome (van Oppen et al., 2001; Wakefield and Kempf, 2001; Rodriguez-  
80 Lanetty et al., 2009; Harii et al., 2009). Despite its importance, we know little  
81 regarding the molecular basis of the establishment of coral-algal symbiosis during  
82 development.

83

84 We are only slowly making progress towards a better understanding of symbiosis  
85 establishment, primarily due to the historical lack of tools and workable laboratory  
86 systems: reef-building corals grow slowly, are sensitive to environmental conditions,  
87 and typically sexually reproduce to spawn larvae only once annually (Babcock, et al.,  
88 1986; Technau and Steele, 2011; Harrison, 2011). Likewise, most other current  
89 cnidarian laboratory models such as *Hydra*, *Nematostella*, *Clytia*, and *Hydractinia* are  
90 not symbiotic (the exception, *Hydra viridissima*, hosts symbionts unrelated to those in  
91 corals and lacks a free-swimming larval stage). The advent of modern molecular  
92 tools has made establishing new model systems far more feasible, and we and our  
93 colleagues have developed the small marine anemone *Aiptasia* into a powerful  
94 model for molecular studies of coral-algal symbiosis (Weis et al., 2008; Goldstein and  
95 King, 2016). Housing the same symbionts as corals yet tractable in the laboratory,  
96 *Aiptasia* now has a range of key resources including a sequenced genome,  
97 transcriptomes (e.g. symbiotic vs. non-symbiotic), advanced microscopy, phenotypic  
98 assays, and controlled sexual reproduction in the laboratory (Sunagawa et al., 2009;  
99 Lehnert et al., 2014; Xiang et al., 2014; Baumgarten et al., 2015; Grawunder et al.,  
100 2015; Bucher et al., 2016). Just as in corals, *Aiptasia* larvae phagocytose symbionts  
101 from the environment (Hambleton et al., 2014; Wolfowicz et al., 2016).

102

103 Despite its success, *Aiptasia* has so far lacked certain tools important for a cell and  
104 developmental model system: namely, the introduction of exogenous material or the  
105 perturbation of endogenous processes. Such ability would be especially useful to  
106 study how *Aiptasia*, and by extension reef-building corals, establish symbiosis anew  
107 in the developing larval stage. To this end, microinjection of material into embryos  
108 has proven an efficient method of genetic engineering in many models, while also  
109 making possible the direct production of F0 manipulated larvae and juveniles for  
110 immediate phenotypic analysis.

111

112 There are currently no published reports of microinjection in *Aiptasia* nor any  
113 symbiotic cnidarian, with one exception of an elegant study involving the injection of  
114 morpholinos into recently spawned coral embryos (Yasuoka et al., 2016). While an  
115 important step forward, the aforementioned difficulties of efficient laboratory work in  
116 corals means that a more fruitful long-term approach would be developing these  
117 techniques in the *Aiptasia* model. We have excellent guides not only from that study  
118 but also from work in the cnidarian models *Hydra*, *Nematostella*, *Clytia*, and  
119 *Hydractinia*, in all of which successful microinjection and genetic engineering  
120 protocols are employed (Wittlieb et al., 2006; Momose et al., 2007; Renfer et al,  
121 2009; Kunzel et al., 2010; Marlow et al., 2012; Layden et al., 2013, Ikmi et al., 2015;  
122 Artigas et al., 2017).

123

124 The development of microinjection and the subsequent introduction of foreign  
125 material would be ground-breaking for the *Aiptasia* and coral-algal symbiosis fields. It  
126 would open the door to myriad observational and functional studies, propelling the  
127 symbiosis field forward and allowing both broad approaches as well as specific  
128 hypothesis testing based on candidate genes. To this end, here we show the  
129 establishment of microinjection in the *Aiptasia* model system in a simple and robust  
130 workflow to introduce exogenous material into embryos for subsequent analysis. We  
131 describe conditions for regular gamete production as a prerequisite to efficient  
132 microinjection. We then show successful introduction of three key materials:  
133 fluorescent protein, mRNA, and DNA plasmids, with visualization of the fluorescent  
134 products in both fixed and live samples. Importantly, introduction of such exogenous  
135 material appears to have no significant effects on either development or symbiosis  
136 establishment, demonstrating the utility of these tools to study fundamental questions  
137 of development and symbiosis establishment in the *Aiptasia* system.

138

139

140 **Results**

141

142 Optimized spawning system and *in vitro* fertilization for zygote production

143 An important prerequisite for zygote microinjection is control over fertilization, which  
144 allows regular access to developmentally synchronized stages. We previously  
145 established a robust, consistent protocol for laboratory induction of *Aiptasia* spawning  
146 based on a blue light cue (simulated full moon) (Grawunder et al., 2015). Building on  
147 this, here we optimized a controlled anemone cultivation system to induce spawning  
148 in female and male anemones separately for gamete collection and *in vitro*  
149 fertilization. Staged sets of sex-segregated mature adults were induced to spawn for  
150 two consecutive months (two lunar simulations), with spawning typically three to four  
151 weeks after the start of each cue (Fig. S1A). Gametes were produced on average 2.7  
152 times per week (n=24 weeks) (Fig. 1A). After spawning, eggs were often in a discrete  
153 patch near the female (Fig. 1B). Sperm was sometimes seen as an obvious expelled  
154 cloud or as milky water, although often it was too dilute to directly observe (data not  
155 shown).

156

157 We next assessed the efficiency of *in vitro* fertilization (IVF) of mixed spawned  
158 gametes. Several hundred eggs were gently transferred into a small plastic petri dish  
159 followed by addition of sperm-containing water. Fertilization efficiency was quantified  
160 after approximately 4-5 h, when developing zygotes could be clearly distinguished  
161 from unfertilized eggs. We found that on average, only 20% of eggs were fertilized in  
162 uncoated petri dishes; however, using dishes that were pre-coated with 0.1% gelatin  
163 in distilled water yielded mean fertilization rates of 87% (Fig. 1C). Coating dishes with  
164 1% BSA in distilled water or agarose in filtered artificial seawater (FASW) was  
165 equally effective (data not shown). We then quantified IVF efficiency over a  
166 timecourse after spawning. On average, while more than 90% of eggs were fertilized  
167 when sperm was added within 15 min after egg release, fertilization rates fell rapidly  
168 over time, reaching 20% when sperm was added to eggs 60 min post-spawning and  
169 nearly 0% after 120 min (Fig. 1D). Thus, time is of the essence to ensure high  
170 fertilization rates.

171

172 Establishment of an efficient *Aiptasia* zygote microinjection procedure

173 After undergoing IVF in coated dishes, zygotes were gently transferred to a dish with  
174 a strip of nylon mesh (80 x 80  $\mu\text{m}$ ) as a substrate to immobilize them for injection  
175 (Fig. S1B). With a mean diameter of 86  $\mu\text{m}$  (Bucher et al., 2016), *Aiptasia* zygotes  
176 settle well into the mesh (Fig. 1E). Using a stereomicroscope set-up (Fig. S1C),

177 material was injected to approx. a third to half of the cell diameter, corresponding to  
178 approximately 10% of the egg volume as assessed visually by the tracer dye or  
179 fluorescent protein. This fluorescence was then used to distinguish injected from non-  
180 injected zygotes (Fig. 1F). In *Aiptasia* zygotes, the first clear indication of  
181 development is the appearance of 4-cell stages approx. 90 min post-fertilization.  
182 Shortly beforehand, zygotes appear box-shaped (Fig. S1D) and we consequently  
183 stop injection; this ensures that material is delivered to cells prior to the first  
184 cleavage. Occasionally, we observed two discrete nuclei before the first obvious  
185 cleavage, likely indicating that the first nuclear division happens without cytokinesis.  
186 The next cleavage occurs approx. 20 min after the first, and embryonic development  
187 continues until the blastula stage approx. 5 h post-fertilization (hpf), at which point  
188 successfully developing embryos are easily distinguished from unfertilized eggs  
189 (arrowhead, Fig. S1E). With practice, one can inject more than 100 zygotes in the  
190 roughly 1 h window before cleavage begins.

191  
192 We quantified the survival rates after 24 h of injected embryos versus those handled  
193 identically but not injected. Embryos injected with any material (i.e. protein and  
194 mRNA; see below) had a survival rate of approx. 49% (332 of 677 injected embryos).  
195 In comparison, the survival rate of control embryos was approx. 61% (306 of 501  
196 control embryos), lower but not significantly different from the injected set (Student's  
197 2-tailed unpaired *t*-test, *p*-value =0.24).

198

#### 199 Microinjection of fluorescent protein into *Aiptasia* larvae

200 To visualize cell outlines in the developing larvae, we recombinantly expressed and  
201 purified Lifeact-eGFP protein (Fig. S2), which in other systems labels the actin  
202 cytoskeleton and has little to no effect on live actin cellular dynamics (Riedl et al.,  
203 2008; Sliogeryte et al., 2016). Microinjected protein instantly and ubiquitously labeled  
204 cell outlines in *Aiptasia* zygotes from the first cell divisions to 24 hours post-  
205 fertilization (hpf), especially in the ectoderm (Fig. 2A). Prominent but weaker staining  
206 was visible 48 hpf, but staining intensity decreased with larval age and was nearly  
207 undetectable 4 days post-fertilization (dpf). Consistent with the survival data above,  
208 we did not observe any appreciable defects or delays in development in injected  
209 embryos relative to uninjected controls (data not shown).

210

#### 211 Microinjection and *in vivo* translation of exogenous mRNA in *Aiptasia* larvae

212 To visualize cell outlines on a longer timescale, as well as to test whether exogenous  
213 mRNA is efficiently translated in *Aiptasia* zygotes, we next injected *in vitro*

214 transcribed bicistronic mRNA from a plasmid encoding eGFP with a nuclear  
215 localization signal (NLS-eGFP) and mCherry with a farnesylation signal (mCherry-  
216 CaaX) separated by the self-cleaving V2A peptide (Fig. 2B). This was previously  
217 shown to simultaneously label cell membranes and nuclei in developing embryos of  
218 the anemone *Nematostella* (Ikmi et al., 2014). Injected mRNA was translated robustly  
219 as indicated by strong, homogeneous, and long-lasting fluorescent labeling of the  
220 cellular structures (Fig. 2C). Labeled membranes and nuclei were detected as early  
221 as 4 hpf. At 6 hpf (blastula stage), signal intensity had further increased and  
222 remained strong for 1-2 dpf, with signal still visible at 4 dpf (Fig. 2C).

223

#### 224 Symbiosis establishment and live imaging of mRNA-injected larvae

225 Importantly for the applicability of this technique to the study of symbiosis, mRNA  
226 injection did not substantially affect symbiont uptake by *Aiptasia* larvae. Using our  
227 standard assay (Bucher et al., 2016), we exposed injected and control larvae to a  
228 compatible symbiont strain and analyzed symbiosis establishment. Injected larvae  
229 appeared developmentally normal and took up symbionts from the environment;  
230 imaging by confocal microscopy showed phagocytosed algae within the host  
231 endoderm that could be clearly distinguished from those in the gastric cavity (Fig.  
232 3A). In four experiments, each with matched injected and control larvae, infection  
233 efficiencies did not differ significantly between mRNA-injected larvae (47%) and non-  
234 injected controls (66%) (Student's 2-tailed unpaired *t*-test, *p*-value = 0.14) (Fig. 3B).  
235 Likewise, the average number of algal cells that each infected larva contained was  
236 similar (3.8 per injected larva vs. 3.7 per control larva; Student's 2-tailed unpaired *t*-  
237 test, *p*-value = 0.37) (Fig. 3C). Excitingly, we observed mCherry-labeling of  
238 symbiosome membranes surrounding internalized algae; this was apparent even in  
239 cases where the larger host cell membrane labeling was difficult to distinguish (Fig.  
240 3D). The intensity of symbiosome labeling and algal red autofluorescence varied  
241 between symbionts (Fig. S3A).

242

243 In order to observe symbionts in living hosts, we immobilized larvae injected with  
244 *NLS-eGFP-V2A-mCherry-CaaX* by embedding them in agarose; this prevented  
245 larvae from swimming, but their rotation caused by ciliary beating continued (Movie  
246 S1). Using this technique, nuclei, cell membranes, and the symbiosome could be  
247 imaged live (Fig. 3E), at a rate of 1 frame per 2.5 sec (Movie S2), which would allow  
248 cellular events to be followed in real time. Embedded larvae survived and could be  
249 imaged for several hours (Fig. S3B).

250



## 251 Microinjection of DNA in *Aiptasia* larvae

252 With the goal of achieving gene expression from exogenous DNA and ultimately  
253 establishing stable transgenesis, we generated plasmids in which the *NLS-eGFP-2A-*  
254 *mCherry-CaaX* reporter was driven by the promoter of different actin genes cloned  
255 from *Aiptasia* (Fig. 4A,B). In each case, the cassette was flanked by recognition sites  
256 for the meganuclease I-SceI (Fig. 4A); co-injection of I-SceI with plasmids containing  
257 these sites strongly increased genomic integration in other species, e.g. medaka and  
258 *Nematostella* (Grabher and Wittbrodt 2007; Renfer and Technau 2017). We identified  
259 six actin genes from the *Aiptasia* genome (Baumgarten et al., 2015), and used larvae  
260 transcriptome data (Wolfowicz et al., 2016) to select the four highest expressed to  
261 clone and use for injection (Fig. 4B). The percentage of larvae displaying reporter  
262 expression at 10 hpf was determined, and was clearly the highest for one promoter  
263 (Accession # XM\_021049442.1, 63%, n=97 larvae, Fig. 4B). Reporter expression  
264 was mosaic in these larvae, with cell patches of varying sizes displaying GFP-labeled  
265 nuclei and mCherry-labeled membranes (Fig. 4C). The three other *Aiptasia*  
266 promoters tested (Fig. 4B) yielded low proportions of larvae with individual  
267 fluorescent cells rather than whole fluorescent patches. For larvae expressing  
268 reporters driven by the XM\_021049442.1 promoter, we did not determine whether  
269 the transgene was stably integrated into the genome, but the successful *in vivo*  
270 expression allows future work to establish *Aiptasia* transgenesis.

271

272

## 273 **Discussion**

274

275 Here we establish a workflow to successfully introduce exogenous protein, mRNA,  
276 and DNA via microinjection into *Aiptasia* zygotes and, critically, we demonstrate that  
277 such manipulation has no significant effects on development or symbiosis  
278 establishment in *Aiptasia* larvae. This progress propels the *Aiptasia* model system  
279 forward in answering fundamental questions regarding development and concurrent  
280 establishment of coral-algal symbiosis. While immediately permitting a range of  
281 observational and functional assays, it also opens the door to CRISPR-Cas9-induced  
282 gene editing and the production of stable transgenic lines. Finally, this work holds  
283 broader implications for comparative developmental biology and emerging  
284 technologies in the current bloom of new model systems across the life sciences.

285

286 This workflow immediately permits in the *Aiptasia* larval system many observational  
287 and functional assays that bring us closer to understanding larval development and



288 symbiosis establishment. The small transparent larvae of *Aiptasia* are amenable to  
289 microscopy, which was until now used to assay fixed specimens (Hambleton et al.,  
290 2014; Bucher et al., 2016). Thus, the investigation of development and the symbiosis  
291 establishment process was necessarily limited to “snapshots”; now, live imaging  
292 permits observation of development and symbiosis dynamics in real time, with  
293 injected genetic material or even commercially available dyes to label conserved  
294 cellular structures.

295

296 To study developmental processes, larvae with labeled cell outlines (Figs 3, 4) and  
297 live imaging can be used to characterize, for example, gastrulation, tissue  
298 differentiation, and cell division and migration. Injected recombinant Lifeact-eGFP  
299 protein instantly labels all cells in developing zygotes, allowing studies of very early  
300 embryonic development. Similarly, injection of *NLS-eGFP-V2A-mCherry-CaaX*  
301 mRNA allows monitoring of cellular dynamics once translation has started. Early and  
302 homogenous expression of exogenous mRNA also allows the manipulation of  
303 developmental genes, such as those involved in patterning and axis establishment,  
304 to monitor dynamics or create overexpression phenotypes.

305

306 To study symbiosis establishment in *Aiptasia* larvae, key goals are to test candidates  
307 for their roles in symbiosis as well as to observe symbiont phagocytosis and  
308 proliferation. Importantly, we can immediately tackle the first goal by using injected  
309 mRNA. For instance, we can now express proteins fused to fluorescent tags to track  
310 their co-localization with symbionts or other proteins, or analyze the effects of the  
311 over-expression phenotypes of symbiosis-specific genes on symbiosis  
312 establishment. The constructs reported here have proven limited for observing  
313 symbiont phagocytosis and proliferation with cellular resolution; both the directly  
314 injected Lifeact-eGFP protein and exogenously expressed farnesylated mCherry lose  
315 resolution in the endoderms of older larvae (Figs 3,4). This phenomenon was also  
316 reported in *Nematostella*, where signal from some mRNA lasts for two months after  
317 injection yet others are rapidly lost (DuBuc et al., 2014). There is however overlap  
318 between signal and symbiosis, as *Aiptasia* larvae acquire symbionts at and after 2  
319 dpf, and signal of the mRNA fades several days later. Furthermore, the unexpectedly  
320 strong labeling of symbiosome membranes by farnesylated mCherry, even in older  
321 larvae, is a great advantage to studies of intracellular symbiosis dynamics.

322

323 We have made progress towards the goal of generating stable transgenic lines by  
324 demonstrating expression of an injected DNA construct with a fluorescent reporter

325 driven by an *Aiptasia* endogenous actin promoter. To date we have only achieved  
326 transient and mosaic expression, but this is a key first step for future transgenesis  
327 attempts. Currently, a drawback in the *Aiptasia* system is that metamorphosis and  
328 settlement of larvae into adults cannot yet be accomplished in the laboratory; multiple  
329 groups are actively working towards identifying the cue to induce closure of the life  
330 cycle. Nevertheless, the identification of a functional *Aiptasia* promoter may  
331 encourage testing alternative approaches to generating stable transgenic lines. For  
332 example, constructs could be delivered via gene bombardment (Böttger *et al.*, 2002)  
333 or electroporation (Bosch *et al.*, 2002; Watanabe *et al.*, 2014) to *Aiptasia* adults,  
334 which rapidly reproduce asexually and have a high regenerative capability.  
335 Dissection of mosaic adults and subsequent regeneration would create lines with  
336 germline transgene transmission.

337  
338 The *Aiptasia* field, and by extension the coral-algal symbiosis field, acutely requires  
339 tools to translate knowledge on molecular players into a mechanistic understanding  
340 at the functional level. In addition to the gain-of-function possibilities outlined above,  
341 the ability to deliver materials by microinjection facilitates the next major leap forward  
342 for the *Aiptasia* model: gene editing by CRISPR-Cas9. Such gene editing would  
343 allow, for the first time, knock-out of candidate genes implicated in symbiosis  
344 establishment to unequivocally and functionally demonstrate their role in symbiosis.  
345 It is apparent that when developing a new model, not all techniques can be  
346 established at once. While some techniques must await, for example, the closure of  
347 the *Aiptasia* life cycle, other techniques can be employed immediately for urgent  
348 questions. Here we show that *Aiptasia* zygotes can be injected in sufficient numbers  
349 and the larvae used for symbiosis studies in the F0 generation.

350  
351 Beyond the *Aiptasia* system, this work holds broader implications for comparative  
352 developmental biology and other emerging model systems. The studies of embryonic  
353 development in *Aiptasia* discussed above would complement those in other systems  
354 to dissect the evolution of fundamental developmental processes, such as  
355 gastrulation. As the sister group to bilaterians, cnidarians are important “evo-devo”  
356 models to infer evolutionary conservation and divergence of development (reviewed  
357 in Layden *et al.*, 2016). The advent of modern research tools has led to rapid  
358 advances in emerging models, as new avenues are opened to study previously  
359 intractable cell biological questions (Cook *et al.*, 2015; Goldstein and King, 2016).  
360 The *Aiptasia* system is currently undergoing this transition: a wealth of resources has  
361 been recently and rapidly built, but missing was the transformative power of

362 manipulation via introduction of exogenous material or targeted functional analysis.  
363 Our progress on this front was inspired by successful techniques in other model  
364 systems, and we hope this work in turn provides helpful “lessons learned” for other  
365 emerging models. With the rapid development of myriad new model systems, we are  
366 in the midst of an exciting time for major discoveries in underexplored cell biological  
367 phenomena.

368

369

## 370 **Material and Methods**

371

### 372 Anemone cultivation for spawning induction

373 Individuals to be used for gamete production were produced asexually by pedal  
374 laceration from adult animals in master stock tanks of either male CC7 (Sunagawa et  
375 al., 2009) or female F003 (Grawunder et al., 2015) clonal lines. To raise them to  
376 sexual maturity, 12-14 medium-sized animals of each line (with an oral disc diameter  
377 of 4-5 mm for F003 and 5-6 mm for CC7) were maintained for 6-7 months as  
378 previously described (Grawunder et al., 2015), in covered, food-grade plastic tanks in  
379 a volume of approximately 1.6 l artificial sea water (ASW). Briefly, tanks were kept at  
380 26°C with a 12L:12D photoperiod from 8 am to 8 pm to allow observation and  
381 maintenance during the daytime. Animals were fed five times a week with fresh  
382 *Artemia* nauplii. Three times per week, the surfaces of the tanks were cleaned with  
383 cotton swabs and ASW was exchanged. During this period, anemones of both lines  
384 grew to an oral disc diameter of 11-12 mm.

385

### 386 Spawning induction of *Aiptasia*

387 To prepare sexually segregated tanks of *Aiptasia* for gamete release, 3-5 mature  
388 animals of either CC7 or F003 were transferred into 300 ml ASW in smaller tanks (#  
389 92CW, Cambro, USA) one week before spawning induction to allow acclimatization  
390 to the new tank. Tanks were fed and cleaned as described above. Tanks were then  
391 kept at 29°C in Aqualytic Incubators (Model TC 135 S, Liebherr, Germany) equipped  
392 with white LEDs (SolarStinger Sunstrip “Marine”, # 00010446, Econlux, Germany) at  
393 an intensity of 23-30  $\mu\text{mol m}^{-2} \text{s}^{-1}$  on a 12L:12D photoperiod with darkness from 4 pm  
394 to 4 am, thereby adjusting the animals’ diurnal rhythms to allow gamete collection  
395 during working hours. To induce gamete release following a simulated full moon cue,  
396 animals were exposed to blue light LEDs (SolarStinger Sunstrip “Deepblue”, #  
397 00010447, Econlux, Germany) at 15-20  $\mu\text{mol m}^{-2} \text{s}^{-1}$  for the entire dark phase on  
398 days 1 to 5 of a 28-day cycle (Grawunder et al., 2015). Each set of tanks was kept for

399 two simulated lunar cycles, and sets were staggered such that the second month of  
400 one tank set overlapped with the first month of the next tank set. As a result, there  
401 was always one tank set in its first month and one in its second. Tanks were  
402 examined for the presence of eggs or sperm using a Leica S8APO stereoscope  
403 Monday through Friday from days 13 to 24 of each cycle. Spawning was checked  
404 from 9am - 10am, approx. 5-6 h after the onset of darkness.

405

#### 406 *In vitro* fertilization (IVF) of gametes

407 Eggs from F003 (female-only) tanks were transferred gently with a plastic transfer  
408 pipette into a small plastic petri dish (60 mm x 15 mm) in a volume of approx. 5-10  
409 ml. On occasion, spawned eggs float instead of forming discrete patches; we had  
410 previously tried to concentrate these using small 40  $\mu$ m filters, but the handling  
411 substantially reduced the number of normally developing embryos. We therefore  
412 used only spawning events that resulted in egg patches for microinjection (Fig. 1A).  
413 To fertilize the eggs, approx. 3-7 ml water from several induced CC7 (male-only)  
414 tanks was added to dish to maximize the chances of sperm presence and  
415 fertilization. Sperm were sometimes observed either in an obvious expelled cloud or  
416 as milky tank water, yet even when too dilute to be detected via stereoscope, they  
417 were nevertheless often present as seen in the generally high fertilization rates (also  
418 confirmed with DIC microscopy and/or Hoechst nuclear staining [data not shown]).

419

420 Noticing low fertilization rates in preliminary experiments, we compared IVF efficiency  
421 of gametes mixed in uncoated petri dishes to those in dishes pre-coated with gelatin.  
422 To coat, a 0.1% solution of gelatin (# G1393, Sigma-Aldrich, Germany) in distilled  
423 water was poured into the dishes, incubated at room temperature (RT) for 5 min,  
424 removed, and then the dishes were air-dried at RT overnight and stored at RT until  
425 further use. Eggs were added to the dishes as described above, and sperm-  
426 containing water was then added at the indicated time-points in Fig. 1D. Based on  
427 the outcome of these comparisons (Figs 1C,D), eggs for microinjection were  
428 afterwards always prepared in a 0.1% gelatin-coated dish and mixed with water from  
429 CC7-containing tanks, as described above, as soon as possible after gamete  
430 release. The eggs and sperm were incubated together at RT for approx. 10 min to  
431 allow fertilization to occur while preparing the equipment and solutions for  
432 microinjection.

433

#### 434 Recombinant expression of Lifeact-eGFP protein in bacteria

435 The Lifeact-eGFP sequence with a C-terminal 6His-tag was PCR amplified from the  
436 plasmid described by Riedl et al. (2008) and subsequently cloned into the pET21a  
437 vector using classical restriction-based cloning methods. For expression in *E.coli*,  
438 cells of strain BL21 were transformed with the plasmid via chemical transformation. A  
439 single colony of transformants was picked and grown in 1 l of LB medium to an OD<sub>600</sub>  
440 of 0.6, at which time protein expression was induced by adding IPTG to a final  
441 concentration of 1 mM. Bacterial cells were recovered by centrifugation at 2,000 *xg*  
442 for 20 min, washed with 50 ml PBS, and re-centrifuged exactly as above. The pellet  
443 was then frozen in liquid nitrogen, stored at -80°C, and quick-thawed at 37°C the  
444 following day. 40 ml lysis buffer (50 mM NaPO<sub>4</sub> pH 8.0, 0.5 M NaCl, 0.5% glycerol,  
445 0.5% Tween-20, 10 mM imidazole, 1 mg/ml lysozyme) was added to each pellet and  
446 mixed to start cell lysis. After stirring for 15 min at 4°C, the lysate was sonicated on  
447 ice with several pulses (Output Control 1.2, Duty Cycle 40%, 15-30 s total) until no  
448 longer viscous. To clarify the lysate, it was spun at 37,000 *xg* for 1 h at 4°C. The  
449 supernatant was then mixed with 2 ml pre-washed Ni-NTA agarose beads (# 31105,  
450 Cube Biotech, Germany) and protein allowed to bind to the beads by rotating 2 h at  
451 4°C. Beads with bound protein were washed three times with 20 ml wash buffer 1 (50  
452 mM NaPO<sub>4</sub> pH 8.0, 250 mM NaCl, 0.05% Tween-20, 20 mM imidazole), once with 20  
453 ml wash buffer 2 (50 mM NaPO<sub>4</sub> pH 6.0, 250 mM NaCl, 0.05% Tween-20, 20 mM  
454 imidazole) and twice 20 ml modified wash buffer 1 (50 mM NaPO<sub>4</sub> pH 8.0, 250 mM  
455 NaCl, 20 mM imidazole). Between each wash, beads were pelleted by centrifuging  
456 for 3 min at 2,800 *xg* at 4°C. Beads were carefully transferred into a poly-prep  
457 chromatography column (# 7311550, BioRad Laboratories) and the protein was  
458 eluted with sequential applications of 500 µl elution buffer (50 mM NaPO<sub>4</sub> pH 8.0, 150  
459 mM NaCl, 250 mM imidazole, 5% glycerol). Collected protein fractions were analyzed  
460 using SDS-PAGE. Fractions with the highest protein content were pooled and  
461 dialyzed against 1x PBS. Protein concentration was determined via Bradford assay  
462 and absorbance measurements at A280 using a Nanodrop 1000 (Thermo Scientific).  
463 Protein aliquots were flash-frozen in liquid nitrogen and stored at -80°C until further  
464 use.

465

#### 466 Synthesis of mRNA for microinjection

467 The *NLS-eGFP-V2A-mCherry-CaaX* construct was transcribed from the pSYC-97  
468 vector, a kind gift from Aissam Ikmi (Kim et al., 2011; Ikmi et al., 2014). mRNA was  
469 synthesized using the mMESSAGE mMachine SP6 kit (# AM1340, Thermo Fisher  
470 Scientific) and purified with the RNeasy Mini Kit (# 74104, Qiagen), according to the  
471 instructions in both kits. The quality and concentration of the mRNA was assessed on

472 a 1% agarose gel and with a Nanodrop 1000 (Thermo Fisher Scientific). The mRNA  
473 was then diluted to 600 ng/ $\mu$ l with RNase-free water and single-use aliquots of 2  $\mu$ l  
474 each were stored at -80°C until use.

475

#### 476 Cloning of DNA plasmid for microinjection

477 The plasmids used in this study were derived from that reported by Renfer et al.  
478 (2010). The *mCherry* CDS in the original plasmid was replaced through classical  
479 restriction-enzyme cloning with the *NLS-EGFP-V2A-mCherry-CAAX-SV40* reporter  
480 cassette amplified from the pSYC-97 vector (Kim et al., 2011). Four actin genes were  
481 selected from the six *Aiptasia* genomic actin loci using normalized expression levels  
482 (Fragments Per Kilobase of transcript per Million mapped reads; FPKM) from  
483 previously published transcriptomes (Wolfowicz et al., 2016); FPKM values of each  
484 gene model were averaged across four assemblies (two aposymbiotic and two  
485 symbiotic replicates) to generate a mean FPKM reflecting global expression in  
486 larvae. The *MyHC1* promoter was replaced through classical restriction-enzyme  
487 cloning with 1.5 kb upstream of the start codon of each of four *Aiptasia* actin genes  
488 (primers and related information in Supp. Table S1). *Aiptasia* genomic DNA (gDNA)  
489 was extracted from individual small symbiotic adults of clonal line CC7 using the  
490 DNeasy Blood & Tissue Kit (#69504, Qiagen) according to the manufacturer's  
491 instructions, and PCR reactions to amplify the regions were each 50  $\mu$ l containing 2U  
492 Phusion polymerase, 0.1  $\mu$ M of each primer, 200  $\mu$ M dNTPs, 1X Phusion HF Buffer  
493 (#B0518S, NEB), and 150 ng template gDNA. Amplification conditions were as  
494 follows: initial denaturation at 98°C for 2 min; 30 cycles of denaturation at 98°C for 15  
495 s, annealing at 60°C for 20 s, extension at 72°C for 2 min; final extension at 70°C for  
496 10 min.

497

#### 498 Solutions of protein, mRNA, and DNA for microinjection

499 For Lifeact-eGFP protein, an aliquot was quick-thawed and injected at a  
500 concentration of ~3.4 mg/ml, using the green fluorescence of the protein itself as an  
501 injection tracer. For mRNA, an aliquot of 600 ng/ $\mu$ l was thawed and mixed 1:1 with  
502 0.5% phenol red in RNase-free water as an injection tracer, for a final concentration  
503 of 300 ng/ $\mu$ l mRNA. For DNA plasmids, a 2  $\mu$ l aliquot of DNA at 250 ng/ $\mu$ l was quick-  
504 thawed and mixed with 2.1  $\mu$ l of either Phenol Red or Alexa-594 injection tracer (see  
505 below), 0.5  $\mu$ l CutSmart Buffer (# B7204S, NEB), and 0.4  $\mu$ l of the meganuclease I-  
506 Scl at 5 Units/ $\mu$ l (# R0694S, NEB), for a final concentration of 250 ng/ $\mu$ l DNA and  
507 0.4 Units/ $\mu$ l enzyme. The mixture was incubated at 37°C for 10-20 min while the  
508 microinjection apparatus was assembled. Phenol red, a pH indicator that appears



509 yellow when intracellular but red in seawater, provides a clear indication of when  
510 injection has been successful and, crucially, does not interfere with later  
511 fluorescence. Its disadvantage is that it quickly dissipates within zygotes, requiring  
512 transfer to a separate dish very soon after injection while the tracer can still be seen,  
513 interrupting the work. A fluorescent tracer is preferable when possible because it  
514 remains visible for longer and facilitates later selection of injected zygotes. We  
515 therefore use the fluorescent tracer 10,000 MW dextran coupled to Alexa-594 dye (#  
516 D22913, Invitrogen) at a final injection concentration of 0.2-0.5  $\mu\text{g}/\mu\text{l}$  (Fig. 1F).

517

### 518 Microinjection

519 Following Wessel et al., 2010, the injection dish was prepared ahead of time by  
520 affixing a strip of 80 x 80  $\mu\text{m}$  nylon mesh (# SW10080.010.010, Meerwassershop  
521 ([www. Meerwassershop.de](http://www.Meerwassershop.de)), Germany) to the lower inside surface of a small petri  
522 dish lid (35 x 10 mm), using a line of silicon grease around the edges of the mesh  
523 (Fig. S1B). FASW was then added to cover the bottom entirely. Zygotes were  
524 concentrated in the center of the fertilization dish by gentle rotation, and slowly taken  
525 up with a 10  $\mu\text{l}$  pipette with a plastic disposable tip. The zygotes were gently ejected  
526 into the injection dish under water, so that they fell sparsely in a stripe onto the mesh  
527 and settled into the holes. We noted that zygotes as well as developing embryos are  
528 sensitive and should be pipetted as gently as possible to avoid developmental  
529 defects.

530

531 Injection solution was loaded into a Femtotip needle (# 5242952008, Eppendorf)  
532 using Microloader tips (# 5242956003, Eppendorf) and allowed to run into the tip by  
533 gravity flow. Microinjections were performed with a manual micromanipulator (U-  
534 31CF micromanipulator [Narishige, Japan] with a standard universal capillary holder  
535 [# 920007392, Eppendorf] and Femtotip adapter [# 5176190002, Eppendorf])  
536 attached to a FemtoJet 4i microinjector (# Num. 5252000013, Eppendorf). The angle  
537 of the needle holder to the bench-top was approximately 55°. Either the “constant  
538 flow” or the “injection” setting on the microinjector was used to deliver the solution  
539 into the cell. Solution flow and approx. injected amount (roughly 1/3 cell diameter or  
540 approx. 10% of cell volume) was visually assessed during the session and the  
541 pressure adjusted as necessary; during the session, the needle tip may need to be  
542 broken to remove blockages and then the injection pressure recalibrated.  
543 Microinjections were conducted either on a Nikon SMZ18 stereoscope or a Leica  
544 MSV269 stereoscope using a 0.5x objective or 1x objective, respectively. Injection  
545 was conducted either under white illumination to visualize zygotes and phenol red



546 tracer, or, when applicable, indirect white illumination together with additional  
547 epifluorescent illumination and filters to visualize protein/tracer fluorescence. We  
548 injected by keeping the dish stationary and moving the needle between zygotes and  
549 along its own axis to enter each zygote (Fig. S1C).

550

551 Zygotes were injected for approx. 60 min, corresponding to until approx. 90 min after  
552 fertilization, at which time the first cleavages began. Zygotes injected using the tracer  
553 phenol red were transferred immediately after injection (before the tracer  
554 disappeared) by aspirating them individually into the well of a 6-well culture plate  
555 filled with approximately 5 ml of FASW using a P10 pipette. Zygotes injected with  
556 Lifeact-eGFP or other fluorescent tracer could be distinguished from non-injected  
557 zygotes and transferred at the end of the injection session. Eggs that were uninjected  
558 but otherwise handled identically in all steps, including addition to and removal from  
559 the injection dish, served as controls. Plates with microinjected embryos were kept in  
560 the dark at 29°C to develop.

561

#### 562 Assay of symbiosis establishment in larvae

563 Infection of injected or control larvae with *Symbiodinium* strain SSB01 (Xiang et al.,  
564 2013) was performed as described previously (Bucher et al., 2016). Briefly, larvae  
565 were kept in 5 ml of FASW in a 6-well plate, and algae were added to a final  
566 concentration of 100,000 algal cells/ml and mixed gently with a pipette. Algae and  
567 larvae were co-cultivated for 1 or 3 days, after which larvae were fixed, mounted on  
568 slides, and assessed by epifluorescence microscopy, as described below. Infection  
569 rates were determined by counting the number of larvae containing algae (percent  
570 infected) and the number of algal cells that each infected larva contained, as  
571 described previously (Bucher et al., 2016).

572

#### 573 Microscopy and image analysis

574 Transmitted light and fluorescence images of live zygotes in Fig. 1 and Supp. Fig. 1  
575 were acquired using a Nikon SMZ18 binocular microscope. For imaging of fixed  
576 samples in Figs. 2,3,4, larvae were incubated for 15 min in 3.7% formaldehyde in  
577 FASW, washed three times in PBS containing 0.2% Triton X-100, and then mounted  
578 in 50% glycerol in PBS. For live imaging in Figs 1E, S3, and Supp. Movie 1, samples  
579 were embedded in agarose to restrict movement with the following method. Each  
580 imaging chamber was a small petri dish with a drilled hole in the bottom (diameter =  
581 1.5 cm), which was then sealed by a coverslip glued to the exterior. Larvae were  
582 collected into a volume of 5-10  $\mu$ l FASW and gently transferred to the dish bottom in

583 the middle of the coverslip. 25 µl of liquid 1.8% low-melt agarose (Sigma-Aldrich, #  
584 A9414) in FASW at 37°C was added to the larvae on the coverslip and briefly mixed.  
585 A small round coverslip (Electron Microscopy Sciences, # 72230-01) was  
586 immediately placed on top and very slightly pressed. 5 ml of FASW was then added  
587 and the petri dish sealed to prevent evaporation. Images in Figure 2 were acquired  
588 using a Nikon A1 confocal microscope with a Nikon Plan Fluor 60x water immersion  
589 objective and Nikon Elements software. Images in Fig. 3 and 4 were acquired with a  
590 Leica SP8 confocal laser scanning microscope and a 63x/1.30 glycerol immersion  
591 lens using Leica LAS X software. Fluorophores were excited with 488 nm and 594  
592 nm laser lines. GFP was detected at 493-571 nm, mCherry at 599-650 nm, and algal  
593 red autofluorescence at 656-692 nm. All image processing was performed using Fiji  
594 (Schindelin et al., 2012).

595

596

597

#### 598 **Author contributions**

599 V.A.S.J., M.B., E.A.H. and A.G. designed the experiments. V.A.S.J. and M.B.  
600 performed the experiments. V.A.S.J., M.B., E.A.H. and A.G. wrote the manuscript. All  
601 authors reviewed and approved the manuscript.

602

603

#### 604 **Acknowledgments**

605 We thank Natascha Bechtoldt, Marie Jacobovitz, and Gideon Bergheim for technical  
606 help, and Steffen Lemke, Thomas Holstein, Mark Lommel, Suat Özbek, Jochen  
607 Wittbrodt, and Aissam Ikmi for advice, comments, and sharing reagents and  
608 equipment. We also thank Christian Ackermann at the Heidelberg Nikon Imaging  
609 Center for technical support with microscopy.

610

611

#### 612 **Competing Interests**

613 No competing interests declared.

614

615

#### 616 **Funding**

617 This work was supported by the Deutsche Forschungsgemeinschaft (DFG) [Emmy  
618 Noether Program Grant GU 1128/3-1 to A.G.], by the European Commission Seventh  
619 Framework Marie-Curie Actions [FP7-PEOPLE-2013-CIG to A.G.], by the H2020

620 European Research Council [ERC Consolidator Grant 724715 to A.G.]; and by the

621 European Molecular Biology Organization [Long-Term Fellowship to V.A.S.J.].

622

623

624 **References**

625

626 Artigas, G. Q., Lapébie, P., Leclère, L., Takeda, N., Deguchi, R., Jékely,  
627 G., Momose, T. & Houliston, E. (2017). CRISPR/Cas9 mutation of a gonad-expressed  
628 opsin prevents jellyfish light-induced spawning. *bioRxiv* doi: 10.1101/140210

629

630 Babcock, R. C., Bull, G. D., Harrison, P. L., Heyward, A. J., Oliver, J. K., Wallace, C.  
631 C. & Willis, B. L. (1986). Synchronous spawnings of 105 scleractinian coral species  
632 on the Great Barrier Reef. *Mar Biol* **90**, 379-94.

633

634 Baumgarten, S., Simakov, O., Esherick, L. Y., Liew, Y. J., Lehnert, E. M., Michell, C.  
635 T., Li, Y., Hambleton, E. A., Guse, A., Oates, M. E., *et al.* (2015). The genome of  
636 *Aiptasia*, a sea anemone model for coral symbiosis. *Proc Natl Acad Sci USA* **112**,  
637 11893-8.

638

639 Bosch, T. C., Augustin, R., Gellner, K., Khalturin, K., and Lohmann, J. U. (2002). *In*  
640 *vivo* electroporation for genetic manipulations of whole *Hydra* polyps.  
641 *Differentiation* **70**, 140-7.

642

643 Böttger, A., Alexandrova, O., Cikala, M., Schade, M., Herold, M., and David, C. N.  
644 (2002). GFP expression in *Hydra*: lessons from the particle gun. *Dev Genes*  
645 *Evol* **212**, 302-5.

646

647 Bucher, M., Wolfowicz, I., Voss, P. A., Hambleton, E. A. & Guse, A. (2016).  
648 Development and symbiosis establishment in the cnidarian endosymbiosis model  
649 *Aiptasia* sp. *Sci Rep* **6**, 19867.

650

651 DuBuc, T. Q., Dattoli, A. A., Babonis, L. S., Salinas-Saavedra, M., Rottinger, E.,  
652 Martindale, M. Q. & Postma, M. (2014). *In vivo* imaging of *Nematostella vectensis*  
653 embryogenesis and late development using fluorescent probes. *BMC Cell Biol* **15**,  
654 44.

655

656 Goldstein, B. & King, N. (2016). The future of cell biology: Emerging model  
657 organisms. *Trends Cell Biol* **26**, 818-24.

658

659 Grabher, C. & Wittbrodt, J. (2007). Meganuclease and transposon mediated  
660 transgenesis in medaka. *Genome Biol* **8**, Suppl 1:S10.

661  
662 Grawunder, D., Hambleton, E. A., Bucher, M., Wolfowicz, I., Bechtoldt, N. & Guse, A.  
663 (2015). Induction of gametogenesis in the cnidarian endosymbiosis model *Aiptasia*  
664 sp. *Sci Rep* **5**, 15677.  
665  
666 Hambleton, E. A., Guse, A. & Pringle, J. R. (2014). Similar specificities of symbiont  
667 uptake by adults and larvae in an anemone model system for coral biology. *J Exp*  
668 *Biol* **17**, 1613-9.  
669  
670 Harii, S., Yasuda, N., Rodriguez-Lanetty, M., Irie, T. & Hidaka, M. (2009). Onset of  
671 symbiosis and distribution patterns of symbiotic dinoflagellates in the larvae of  
672 scleractinian corals. *Mar Biol* **156**, 1203-12.  
673  
674 Harrison, P. L. Sexual reproduction of scleractinian corals. In *Coral Reefs: an*  
675 *Ecosystem in Transition* (eds. Zubinsky, Z. & Stambler, N.) 59-85 (Springer, 2011).  
676  
677 Ikmi, A., McKinney, S. A., Delventhal, K. M. & Gibson, M. C. (2014). TALEN and  
678 CRISPR/Cas9-mediated genome editing in the early-branching metazoan  
679 *Nematostella vectensis*. *Nat Commun* **5**, 5486.  
680  
681 Kim, J. H., Lee, S. R., Li, L. H., Park, H. J., Park, J. H., Lee, K. Y., Kim, M. K., Shin,  
682 B. A. & Choi, S. Y. (2011). High cleavage efficiency of a 2A peptide derived from  
683 porcine teschovirus-1 in human cell lines, zebrafish and mice. *PLoS One* **6**, e18556.  
684  
685 Künzel, T., Heiermann, R., Frank, U., Müller, W., Tilmann, W., Bause, M., Nonn,  
686 A., Helling, M., Schwarz, R. S. & Plickert, G. (2010). Migration and differentiation  
687 potential of stem cells in the cnidarian *Hydractinia* analysed in eGFP-transgenic  
688 animals and chimeras. *Dev Biol.* **348**, 120-9.  
689  
690 Layden, M.J ., Röttinger, E., Wolenski, F. S., Gilmore, T. D. & Martindale, M. Q.  
691 (2013). Microinjection of mRNA or morpholinos for reverse genetic analysis in the  
692 starlet sea anemone, *Nematostella vectensis*. *Nat Protoc.* **8**, 924-34.  
693  
694 Lehnert, E. M., Mouchka, M. E., Burriesci, M. S., Gallo, N. D., Schwarz, J. A. &  
695 Pringle, J. R. (2014). Extensive differences in gene expression between symbiotic  
696 and aposymbiotic cnidarians. *G3 (Bethesda)* **4**, 277-95.  
697

- 698 Marlow, H., Roettinger, E., Boekhout, M. & Martindale, M. Q. (2012). Functional roles  
699 of Notch signaling in the cnidarian *Nematostella vectensis*. *Dev Biol.* **362**, 295-308.  
700
- 701 Momose, T. & Houliston, E. (2007). Two oppositely localised frizzled RNAs as axis  
702 determinants in a cnidarian embryo. *PLoS Biol.* **5**, e70.  
703
- 704 Muscatine, L. The role of symbiotic algae in carbon and energy flux in coral reefs. In  
705 *Coral Reefs* (ed. Zubinsky, Z.) 75-87 (Elsevier, 1990).  
706
- 707 Renfer, E. & Technau, U. (2017). Meganuclease-assisted generation of stable  
708 transgenics in the sea anemone *Nematostella vectensis*. *Nat Protoc* **12**, 1844-1854  
709
- 710 Renfer, E. Amon-Hassenzahl, A., Steinmetz, P. R. & Technau, U. (2010). A muscle-  
711 specific transgenic reporter line of the sea anemone, *Nematostella vectensis*. *Proc*  
712 *Natl Acad Sci USA* **107**, 104-8.  
713
- 714 Riedl, J., Crevenna, A. H., Kessenbrock, K., Yu, J. H., Neukirchen, D., Bradke, F.,  
715 Jenne, D., Holak, T. A., Werb, Z., Sixt, M. & Wedlich-Soldner, R. (2008). Liefect: a  
716 versatile marker to visualize F-actin. *Nat Methods* **5**, 605-7.  
717
- 718 Rodriguez-Lanetty, M., Wood-Charlson, E., Hollingsworth, L., Krupp, D. & Weis, V.  
719 (2006). Temporal and spatial infection dynamics indicate recognition events in the  
720 early hours of a dinoflagellate/coral symbiosis. *Mar Biol* **149**, 713-9.  
721
- 722 Schindelin, J., Arganda-Carreras, I., Frise, E., Kaynig, V., Longair, M., Pietzsch, T.,  
723 Preibisch, S., Rueden, C., Saalfeld, S., Schmid, B., *et al.* (2012). Fiji: an open-source  
724 platform for biological-image analysis. *Nat Methods* **9**, 676-82.  
725
- 726 Sliogeryte, K., Thorpe, S. D., Wang, Z., Thompson, C. L., Gavara, N. & Knight, M. M.  
727 (2016). Differential effects of LifeAct-GFP and actin-GFP on cell mechanics assessed  
728 using micropipette aspiration. *J Biomech.* **49**, 310-7.  
729
- 730 Sunagawa, S., Wilson, E. C., Thaler, M., Smith, M. L., Caruso, C., Pringle, J. R.,  
731 Weis, V. M., Medina, M. & Schwarz, J. A. (2009). Generation and analysis of  
732 transcriptomic resources for a model system on the rise: the sea anemone *Aiptasia*  
733 *pallida* and its dinoflagellate endosymbiont. *BMC Genomics* **10**, 258.  
734

- 735 Technau, U. & Steele, R. E. (2011). Evolutionary crossroads in developmental  
736 biology: Cnidaria. *Development*. **138**, 1447-58.  
737
- 738 van Oppen, M. (2001). *In vitro* establishment of symbiosis in *Acropora millepora*  
739 planulae. *Coral Reefs* **20**, 200.  
740
- 741 Wakefield, T. S. & Kempf, S. C. (2001). Development of host- and symbiont-specific  
742 monoclonal antibodies and confirmation of the origin of the symbiosome membrane  
743 in a cnidarian-dinoflagellate symbiosis. *Biol Bull* **200**, 127-43.  
744
- 745 Watanabe, H., Schmidt, H. A., Kuhn, A., Höger, S. K., Kocagöz, Y., Laumann-Lipp,  
746 N., Özbel, S. & Holstein, T. H. (2014). Nodal signalling determines biradial  
747 asymmetry in *Hydra*. *Nature* **515**, 112-115.  
748
- 749 Weis, V. M., Davy, S. K., Hoegh-Guldberg, O., Rodriguez-Lanetty, M. & Pringle, J. R.  
750 (2008). Cell biology in model systems as the key to understanding corals. *Trends*  
751 *Ecol Evol* **23**, 369-76.  
752
- 753 Wessel, G. M., Reich, A. M. and Klatsky, P. C. (2010). Use of sea stars to study  
754 basic reproductive processes. *Syst Biol Reprod Med* **56**, 236–45.  
755
- 756 Wittlieb, J., Khalturin, K., Lohmann, J. U., Anton-Erxleben, F. & Bosch, T. C. (2006).  
757 Transgenic *Hydra* allow *in vivo* tracking of individual stem cells during  
758 morphogenesis. *Proc Natl Acad Sci USA* **103**, 6208-11.  
759
- 760 Wolfowicz, I., Baumgarten, S., Voss, P. A., Hambleton, E. A., Voolstra, C. R., Hatta,  
761 M. & Guse, A. (2016). *Aiptasia* sp. larvae as a model to reveal mechanisms of  
762 symbiont selection in cnidarians. *Sci Rep* **6**, 32366.  
763
- 764 Xiang, T., Hambleton, E. A., DeNofrio, J. C., Pringle, J. R. & Grossman, A. R. (2013).  
765 Isolation of clonal axenic strains of the symbiotic dinoflagellate *Symbiodinium* and  
766 their growth and host specificity. *J Phycol* **49**, 447-58.  
767
- 768 Yasuoka, Y., Shinzato, C. & Satoh, N. (2016). The mesoderm-forming gene  
769 brachyury regulates ectoderm-endoderm demarcation in the coral *Acropora digitifera*.  
770 *Curr Biol*. **26**, 2885-92.  
771



772 Yellowlees, D., Rees, T. A. V. & Leggat, W. (2008). Metabolic interactions between  
773 algal symbionts and invertebrate hosts. *Plant Cell Environ* **31**, 679-94.  
774  
775

776 **Figure legends**

777

778

779 **Figure 1: Spawning induction and *in vitro* fertilization in *Aiptasia***

780 (A) Culture and induction regime provides gametes throughout the week.  
781 Percentage of spawning events on each weekday (total from 24 weeks). (B) Female  
782 animal with egg patch (arrowhead). Scale = 5 mm. (C) Gelatin coating increases  
783 fertilization success.  $n=3$ ;  $p<0.01$ ; error bars, s.d. (D) Fertilization success rapidly  
784 decreases over time after spawning ( $n=5$ ). Error bars, s.d. (E) Zygotes are  
785 transferred into a microinjection dish filled with FASW, where they sink into holes in  
786 the mesh. Scale = 200  $\mu\text{m}$ . (D) Co-injection of dextran-AlexaFluor 594 allows  
787 identification of successfully injected zygotes. Injected zygotes are brightly  
788 fluorescent whereas uninjected zygotes appear dark (arrowhead). Scale = 200  $\mu\text{m}$ .

789

790

791 **Figure 2: Microinjection of recombinant Lifeact-eGFP protein and mRNA to**

792 **fluorescently label nuclei and cell outlines**

793 (A) Zygotes injected with ~3.4 mg/ml Lifeact-eGFP protein were fixed 2, 4, 6 and 24  
794 hpf. Maximum projections of 5 z-planes near the surface or centre of the embryo are  
795 shown. Scale = 25  $\mu\text{m}$ . (B) Schematic representation of bicistronic *in vitro*  
796 transcribed *NLS-eGFP-V2A-mCherry-CaaX* mRNA: eGFP with a nuclear  
797 localization signal (NLS) is coupled to mCherry with a C-terminal CaaX box for  
798 farnesylation and insertion into the membrane. The fluorophores are separated by  
799 the self-cleaving V2A peptide. (C) mRNA-injected embryos were fixed 6 or 24 hpf or  
800 4 days post-fertilization (dpf). Left panels show eGFP-labeled nuclei, middle panels  
801 show mCherry-labeled membranes, and the right panel shows the merged images  
802 (eGFP green; mCherry magenta). Scale = 25  $\mu\text{m}$ .

803

804 **Figure 3: Symbiosis establishment and live imaging in microinjected larvae**

805 (A) Larvae expressing the injected *NLS-eGFP-V2A-mCherry-CaaX* mRNA and  
806 containing acquired symbiont cells (brightly autofluorescent in magenta mCherry  
807 channel). Symbionts within endodermal tissue (arrowhead) can be distinguished from  
808 those in the gastric cavity (asterisk). Larvae were incubated with *Symbiodinium* strain  
809 SSB01 at a concentration of 100,000 cells per ml for 3 days. Scale = 25  $\mu\text{m}$ . (B)  
810 Infection efficiencies and (C) average number of algae per larva do not significantly  
811 differ in mRNA injected and control larvae. (D) Symbionts autofluoresce in the

812 mCherry channel (magenta) and the red channel (cyan). The mCherry-labeled  
813 symbiosome membrane can be clearly seen surrounding the internalized symbiont.  
814 Larva were injected with *NLS-eGFP-2A-mCherry-CaaX* mRNA and incubated for 1  
815 day with *Symbiodinium* strain SSB01, before fixation at 3 dpf. Scale = 5  $\mu\text{m}$ . (E)  
816 Symbionts and symbiosome membranes (arrowheads) can be imaged *in vivo*. Larva  
817 injected with *NLS-eGFP-2A-mCherry-CaaX* mRNA and incubated for 1 day with  
818 *Symbiodinium* strain SSB01, before embedding in agarose and imaging at 3 dpf.  
819 Scale = 10  $\mu\text{m}$ .

820

821

822 **Figure 4: Microinjection of DNA into *Aiptasia* zygotes**

823 (A) Schematic of injected plasmids: the promoter of an *Aiptasia* actin gene drives  
824 expression of the *NLS-eGFP-V2A-mCherry-CaaX* reporter with a SV40 termination  
825 sequence. Meganuclease I-SceI recognition sites are indicated. (B) The promoter of  
826 actin gene XM\_021049442.1 drives reporter expression in the majority of larvae  
827 coinjected with plasmid and the meganuclease I-SceI. For each promoter tested, the  
828 expression level (FPKM) (larvae transcriptomes, Wolfowicz et al., 2016), the number  
829 of larvae injected and analyzed, and the percentage of larvae in which GFP signal  
830 could be detected are given. (C) Coinjection of I-SceI and the *prom* XM\_021049442.1:  
831 *NLS-eGFP-V2A-mCherry-CAAX:SV40* plasmid causes strong, mosaic expression of  
832 the transgene, labeling nuclei (green) and membranes (magenta). 10 hpf, scale = 25  
833  $\mu\text{m}$ .

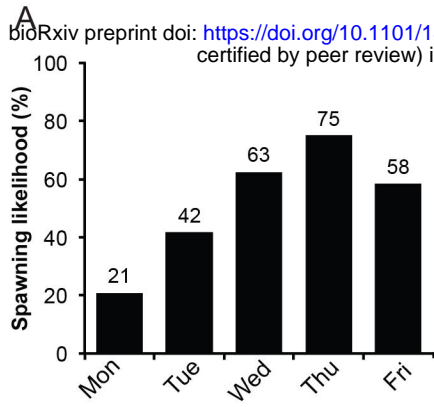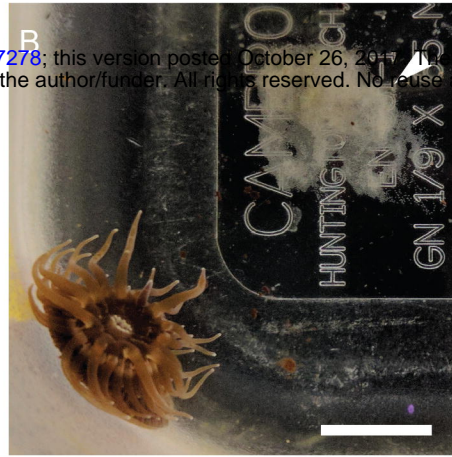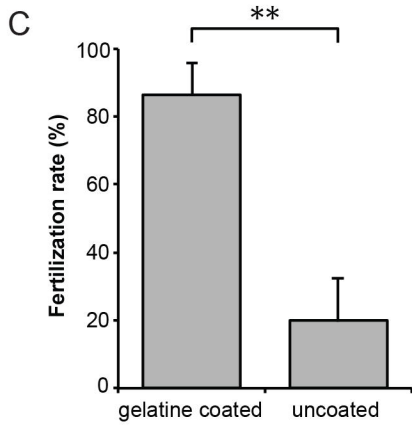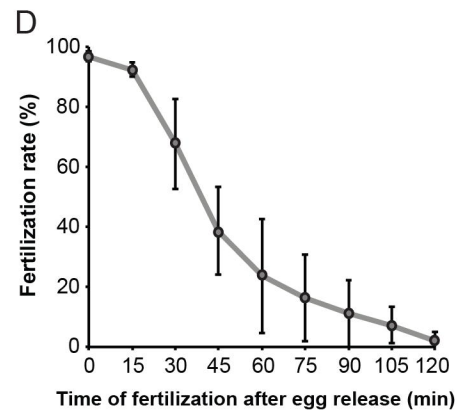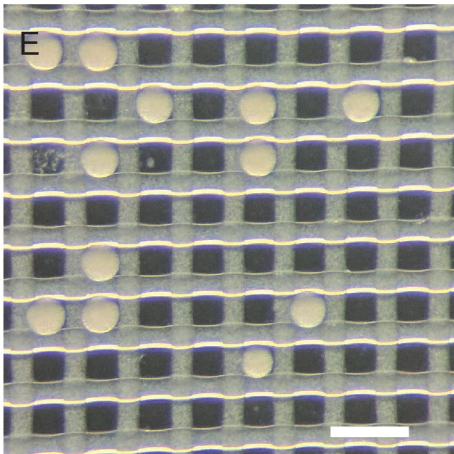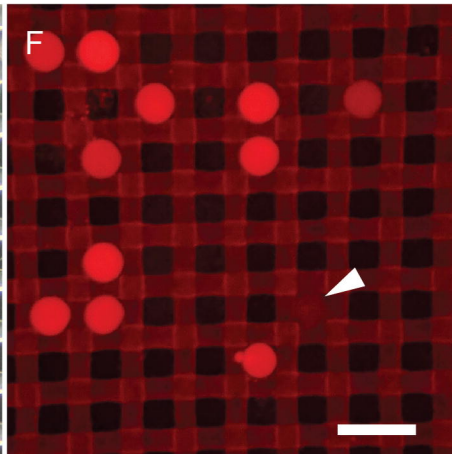

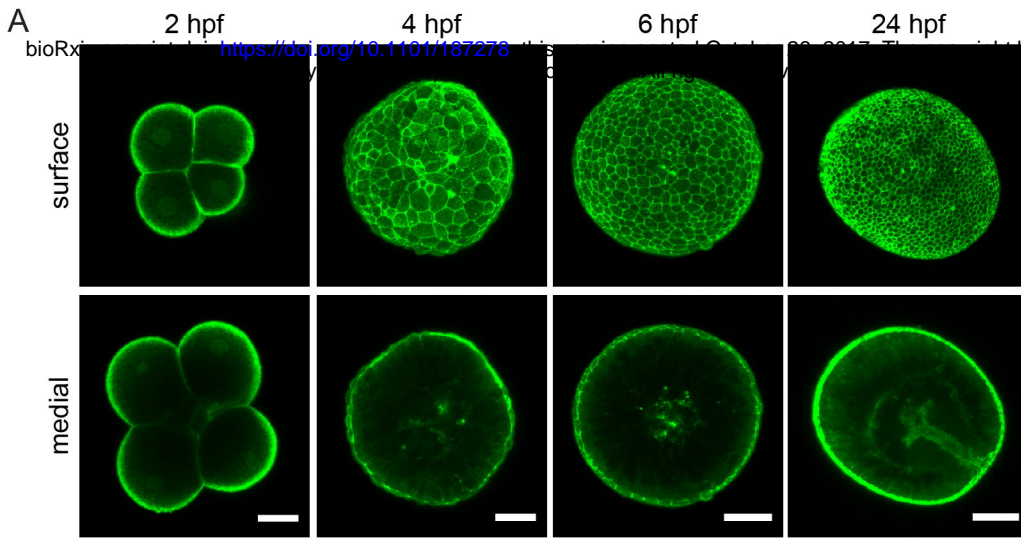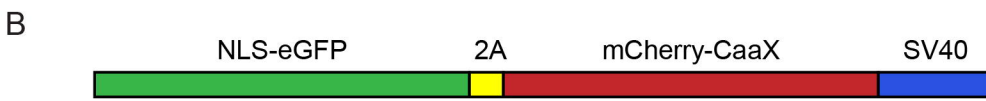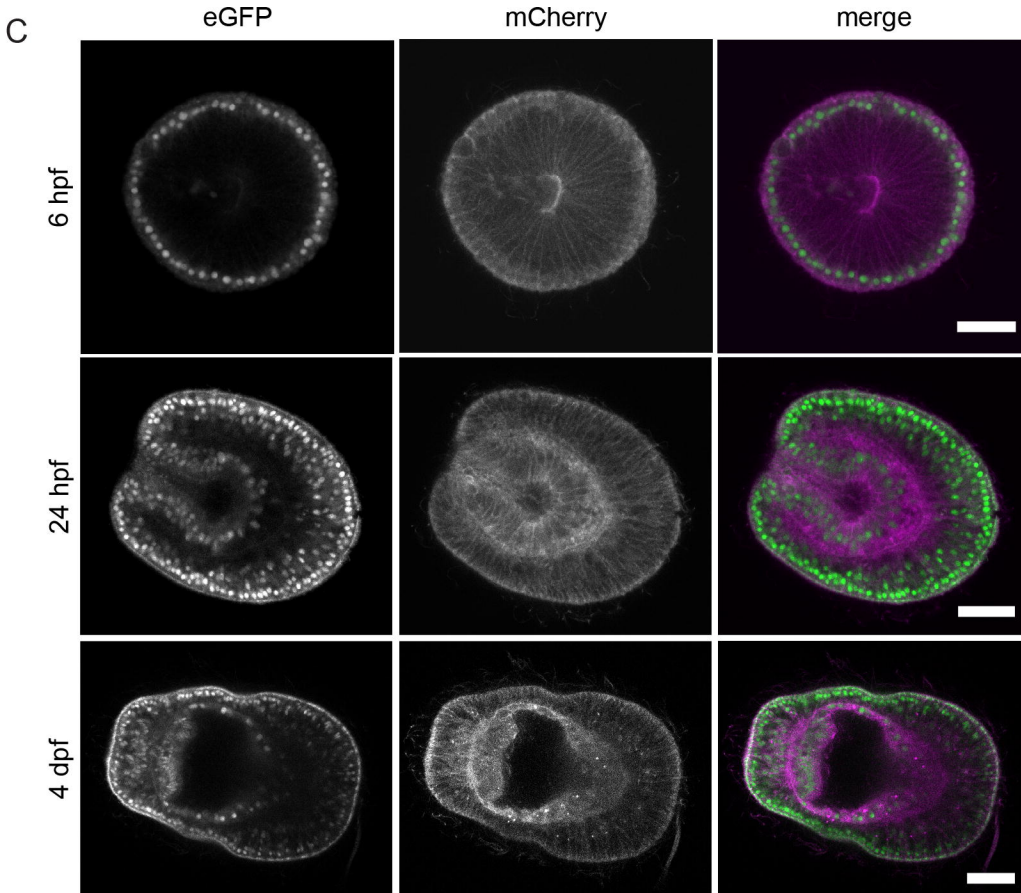



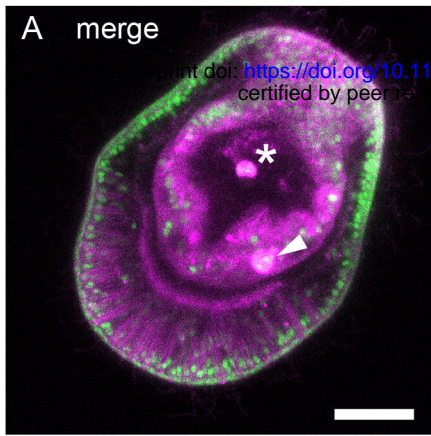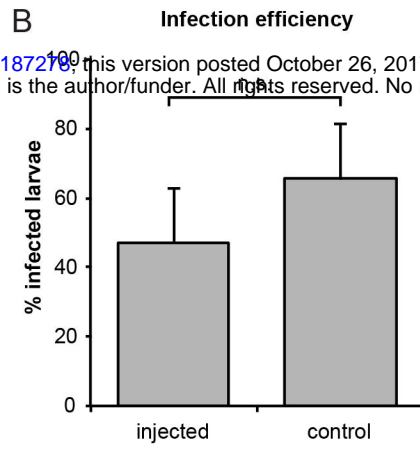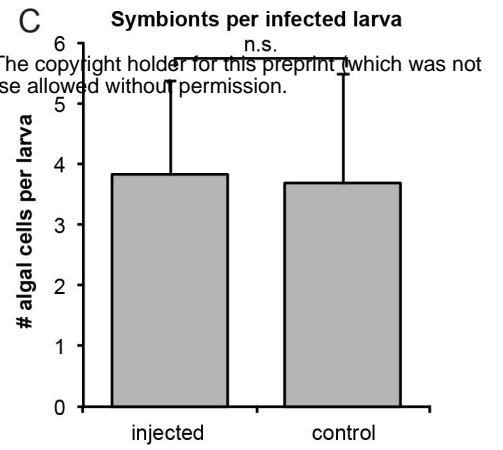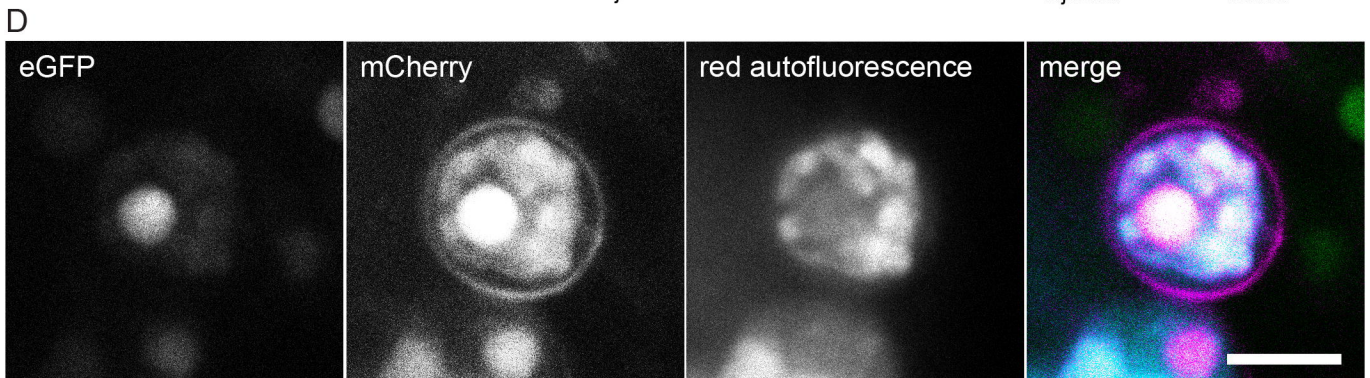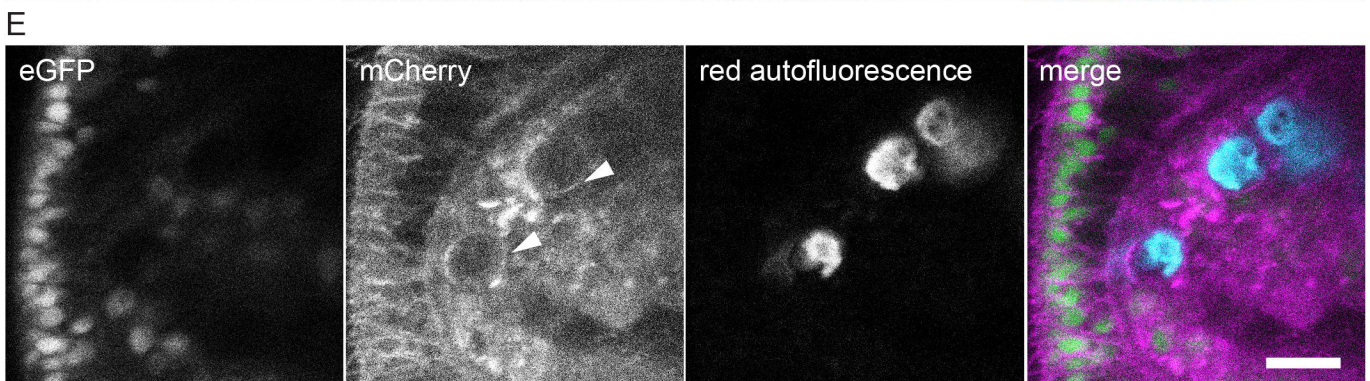

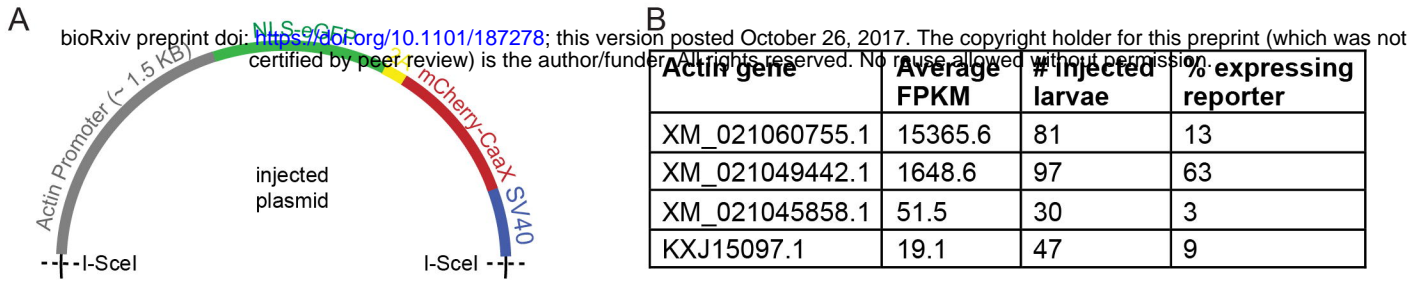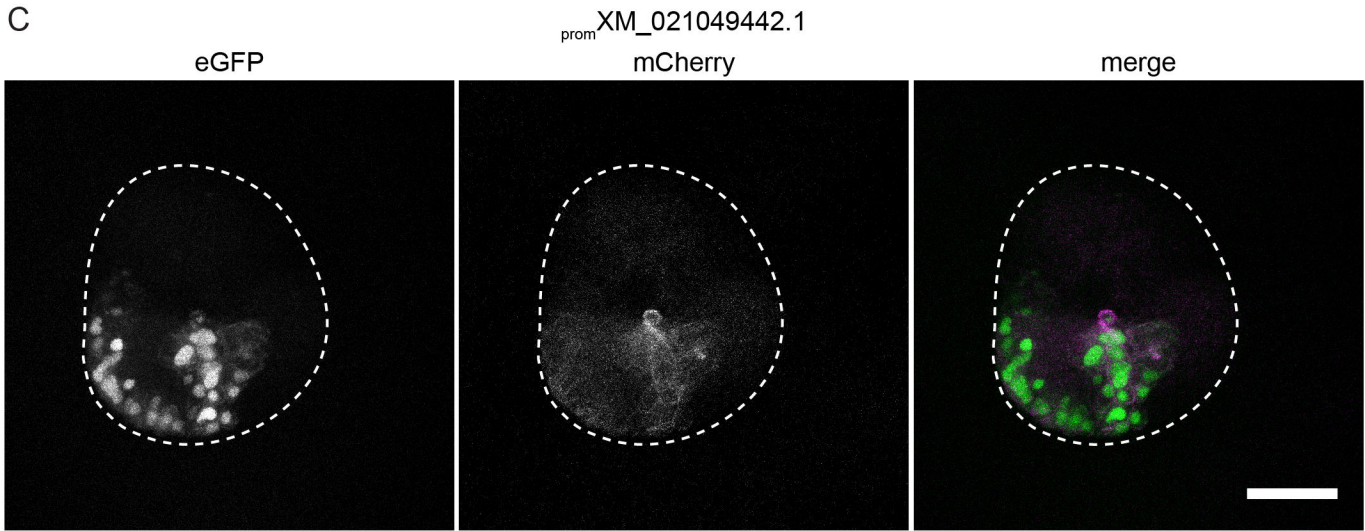

Source: https://www.biorxiv.org/content/10.1101/187278v2.full.pdf
